# Supplementary material
Source: PubMed Central journal article supplement (PMC4194071)
Supplement: NIHMS582338-supplement-8.xls [file NIHMS582338-supplement-8.xls]

Supplementary Table 6. Mean expression values of granular effector molecules in neutrophils. Table for Figure 7A.							


Name	Description	GN.B6	GN.Balb	TMC.Gr1hi.4T1.T	TMC.Gr1hi.Her2.T	TMC.Gr1hi+.4T1.Sp	TMC.Gr1Hi11c-.B16.T
10380174	Mpo	117.57769	115.71947	120.464	125.19414	567.22508	146.19145
10364535	Elane	95.55948	102.26091	122.01227	101.39219	419.54693	94.11198
10420261	Ctsg	43.14293	50.26144	74.18959	66.08461	224.96849	58.41496
10364529	Prtn3	80.48007	77.30017	144.31067	111.1807	332.66308	130.83548
10478031	Bpi	50.14296	48.76142	58.40527	48.45036	53.85678	52.41788
10589703	Ltf	12148.15333	12042.97253	2376.53112	267.51489	7890.75686	242.91684
10597098	Camp	8516.39545	10094.93773	1020.08488	141.88091	4983.95392	126.19968
10372648	Lyz2	13625.87666	13251.37837	4797.75154	9311.84497	9359.11136	6967.54258
10372652	Lyz1	739.9272	698.39636	176.0401	382.39935	339.91601	284.96916
10583100	Mmp8	12410.06904	11642.93642	2960.15974	705.3086	7124.76123	2127.09944
10478633	Mmp9	11923.46969	9976.58514	4993.1125	2207.15292	8479.08076	3741.52206
10448278	Mmp25	4661.07853	4193.48677	1003.45539	348.16398	3193.01968	497.406
10582303	Cyba	7390.80001	6263.34499	4384.12287	5023.72132	6613.41149	4641.28429
10481627	Lcn2	15313.49316	14959.44639	10453.89359	5293.94339	13520.8911	8963.26073
10573924	Mmp2	113.70513	110.89157	166.61203	201.65136	137.21571	167.25123
10347335	Slc11a1	3134.66696	2348.65476	3692.41856	3216.87493	3924.63404	4079.73127
10557862	Itgam	5869.1698	5728.08096	2861.7128	2002.4647	4080.5831	2130.11901
10364262	Itgb2	7726.62013	7220.67893	3358.87478	2394.98859	6081.30806	3193.72338
10448124	Fpr1	6956.91633	6553.30572	2315.82183	952.63367	3951.74454	2281.54828
10458382	Cd14	94.15556	148.33689	4801.47953	4405.4605	1416.94608	4353.85612
10360040	Fcgr3	3596.55526	2722.12426	3653.96723	3121.60223	3026.54993	4046.17821
10581605	Hp	6098.0689	5642.49001	4579.68811	1152.22854	7205.38613	2408.89554
